# Supplementary material
Source: publisher site journal article supplement (https://www.dovepress.com/article/524591)
Supplement: Supplementary file 1 [file supp%20mat%20CLEAN.docx]

Table S1

Correlation Analysis in Patients with COPD describing the association of FOT eRIC parameters with total Glittre-ADL Test Time and Handgrip Analysis

|  |  | R  (cmH2O/L/s) | Rp  (cmH2O/L/s) | Rt  (cmH2O/L/s) | I  (cmH2O/L/s2) | C  (mL/cmH2O) |
| --- | --- | --- | --- | --- | --- | --- |
| ADL-Glittre |  |  |  |  |  |  |
| Test time (s) | r  p | 0.2742  0.0868 | 0.2295  0.1543 | 0.2903  0.0692 | 0.0043  0.9791 | -0.3182  **0.0454** |
| ADL-Glittre (% predicted) | | |  |  |  |  |
| Test time (s) | r  p | 0.2169  0.1789 | 0.1938  0.2308 | 0.2296  0.1540 | -0.0504  0.7576 | -0.2567  0.1099 |
| Handgrip |  |  |  |  |  |  |
| Dominant hand | r  p | -0.4789  **0.0018** | -0.1084  0.5053 | -0.3194  **0.0445** | 0.0371  0.8202 | 0.3459  **0.0288** |
| Dominant hand  (% predicted) | r  p | 0.2084  0.9170 | 0.0982  0.5466 | 0.1697  0.2951 | -0.2752  0.0856 | -0.0122  0.9405 |
| Non-dominant hand | r  p | -0.5173  **0.0006** | -0.0959  0.5562 | -0.3167  **0.0465** | 0.0200  0.9022 | 0.3647  **0.0207** |
| Non-dominant hand (% predicted) | r  p | 0.0450  0.7826 | 0.0779  0.6330 | 0.0584  0.7204 | -0.3411  **0.0313** | 0.0657  0.6872 |

Note: Significant p-values (<0.05) are described in bold.

Abbreviations: R, central airway resistance; Rp, peripheral resistance; Rt, total resistance; I, pulmonary inertance; C, alveolar compliance.

Table S2

Correlation Analysis in Patients with COPD Describing the Association of Fractional-order model Parameters with Total Glittre-ADL Test Time and Handgrip Analysis

|  |  | G | H | η |
| --- | --- | --- | --- | --- |
| ADL-Glittre |  |  |  |  |
| Test time (s) | r  p | 0.3782  **0.0161** | 0.4869  **0.0014** | -0.1842  0.2553 |
| ADL-Glittre (% predicted) |  |  |  |  |
| Test time (s) | r  p | 0.3152  **0.0476** | 0.4450  **0.0040** | -0.1985  0.2195 |
| Handgrip |  |  |  |  |
| Dominant hand | r  p | -0.3353  **0.0344** | -0.3311  **0.0369** | -0.0823  0.6138 |
| Dominant hand (% predicted) | r  p | 0.0352  0.8294 | -0.0335  0.8374 | 0.2700  0.0920 |
| Non-dominant hand | r  p | -0.3548  **0.0247** | -0,.480  **0.0278** | -0.1022  0.5303 |
| Non-dominant hand (% predicted) | r  p | -0.0292  0.8582 | -0.1158  0.4769 | 0.1865  0.2492 |

Note: Significant p-values (<0.05) are described in bold.

Abbreviations: G, damping factor; H, respiratory elastance; η, hysteresivity.

Table S3

Accuracy of Oscillometry in Predicting Abnormal Functional Capacity in COPD Based on Glittre-ADL Test

|  | AUC | 95% CI | Se (%) | Sp (%) | Cut-off |
| --- | --- | --- | --- | --- | --- |
| eRIC model |  |  |  |  |  |
| R | | 0.712 | 0.600-0.808 | 78.9 | 61.9 | 2.058 |
| Rp | | **0.918** | 0.835-0.968 | 86.8 | 92.9 | 0.925 |
| Rt | | **0.934** | 0.855-0.977 | 84,2 | 90,5 | 3.291 |
| I | | 0.695 | 0.582-0.793 | 81.6 | 57.1 | 0.008 |
| C | | 0.897 | 0.809-0.954 | 78.9 | 95.2 | 0.011 |
| Fractional-order model | |  |  |  |  |  |
| G | | 0.878 | 0.785-0.940 | 76.3 | 90.5 | 15.374 |
| H | | 0.627 | 0.511-0.732 | 71.1 | 64.3 | 23.409 |
| η | **0.963** | 0.895-0.992 | 97.4 | 90.5 | 0.545 |

Note: The two highest values of AUC are shown in bold.

Abbreviations: R, central airway resistance; Rp, peripheral resistance; Rt, total resistance; I, pulmonary inertance; C, alveolar compliance; G, damping factor; H, respiratory elastance; η, hysteresivity; AUC, Area under the receiver operator characteristic curve; CI, 95% confidence interval; Se, sensibility; Sp, specificity.

Table S4

Accuracy of Oscillometry in Predicting Abnormal Functional Capacity in COPD Based on Handgrip Evaluations

|  | AUC | 95% CI | Se (%) | Sp (%) | Cut-off |
| --- | --- | --- | --- | --- | --- |
| eRIC model |  |  |  |  |  |
| R | | 0.621 | 0.506-0.727 | 35.7 | 90.9 | 3.250 |
| Rp | | **0.740** | 0.630-0.931 | 92.9 | 54.5 | 0.544 |
| Rt | | **0.778** | 0.671-0.863 | 85.7 | 65.2 | 3.314 |
| I | | 0.504 | 0.390-0.618 | 64.3 | 39.4 | 0.006 |
| C | | **0.810** | 0.706-0.889 | 85.7 | 69.7 | 0.013 |
| Fractional-order model | |  |  |  |  |  |
| G | | **0.786** | 0.680-0.870 | 92.9 | 57.6 | 13.779 |
| H | | 0.506 | 0.392-0.620 | 78.6 | 13.6 | 15.351 |
| η | **0.738** | 0.628-0.830 | 92.9 | 57.6 | 0.545 |

Note: The two highest values of AUC are shown in bold.

Abbreviations: R, central airway resistance; Rp, peripheral resistance; Rt, total resistance; I, pulmonary inertance; C, alveolar compliance; G, damping factor; H, respiratory elastance; η, hysteresivity; AUC, Area under the receiver operator characteristic curve; CI, 95% confidence interval; Se, sensibility; Sp, specificity.

Table S5

Data on age and sex on all participants.

| *Basic Group* | | | | |
| --- | --- | --- | --- | --- |
|  | *Control* | | *COPD* | |
| *Volunteer* | *Age* | *Sex* | *Age* | *Sex* |
| *1* | *77* | *F* | *66* | *M* |
| *2* | *67* | *F* | *56* | *F* |
| *3* | *62* | *M* | *67* | *F* |
| *4* | *80* | *M* | *64* | *M* |
| *5* | *53* | *M* | *75* | *F* |
| *6* | *61* | *F* | *65* | *F* |
| *7* | *78* | *F* | *56* | *F* |
| *8* | *53* | *F* | *67* | *M* |
| *9* | *57* | *F* | *61* | *F* |
| *10* | *62* | *F* | *55* | *M* |
| *11* | *77* | *F* | *69* | *F* |
| *12* | *62* | *F* | *74* | *M* |
| *13* | *59* | *F* | *61* | *M* |
| *14* | *86* | *F* | *59* | *M* |
| *15* | *56* | *F* | *63* | *F* |
| *16* | *53* | *F* | *60* | *F* |
| *17* | *59* | *F* | *51* | *F* |
| *18* | *59* | *F* | *70* | *M* |
| *19* | *58* | *F* | *74* | *F* |
| *20* | *65* | *F* | *68* | *F* |
| *21* | *63* | *F* | *67* | *F* |
| *22* | *66* | *M* | *66* | *F* |
| *23* | *58* | *M* | *52* | *M* |
| *24* | *57* | *M* | *68* | *F* |
| *25* | *68* | *M* | *59* | *M* |
| *26* | *50* | *M* | *69* | *F* |
| *27* | *53* | *M* | *73* | *F* |
| *28* | *79* | *M* | *65* | *F* |
| *29* | *56* | *M* | *76* | *M* |
| *30* | *78* | *M* | *56* | *M* |
| *31* | *56* | *M* | *79* | *F* |
| *32* | *56* | *M* | *63* | *M* |
| *33* | *64* | *M* | *66* | *M* |
| *34* | *62* | *M* | *62* | *M* |
| *35* | *68* | *M* | *75* | *M* |
| *36* | *65* | *M* | *62* | *M* |
| *37* | *70* | *M* | *66* | *F* |
| *38* | *71* | *M* | *72* | *M* |
| *39* | *65* | *F* | *62* | *F* |
| *40* | *65* | *F* | *55* | *F* |
